# Supplementary material
Source: PubMed Central journal article supplement (PMC7978235)
Supplement: NIHMS1647424-supplement-supp_1.pdf [file NIHMS1647424-supplement-supp_1.pdf]

|                    | 8-channel Dipole | 8-channel Loop | 16-channel Loop + Dipole |
|--------------------|------------------|----------------|--------------------------|
| $B_1^+$ efficiency | 0.65             | 0.65           | 0.62                     |
| Peak 10 g SAR      | 0.49             | 0.52           | 0.40                     |
| SAR efficiency     | 0.94             | 0.93           | 1.06                     |

**SUPPLEMENTARY TABLE 1.** Quantitative comparison of simulated  $B_1^+$  efficiency, 10 g SAR, and SAR efficiency among the 8-channel dipole antenna, the 8-channel loop, and the 16-channel LD antenna arrays with human model (Duke) in the ROI marked for the highest value.
