# Supplementary material
Source: PubMed Central journal article supplement (PMC7978235)
Supplement: NIHMS1647424-supplement-supp_2.pdf [file NIHMS1647424-supplement-supp_2.pdf]

### $B_1^+$ efficiency ( $B_1^+/\sqrt{W}$ ) -Simulation

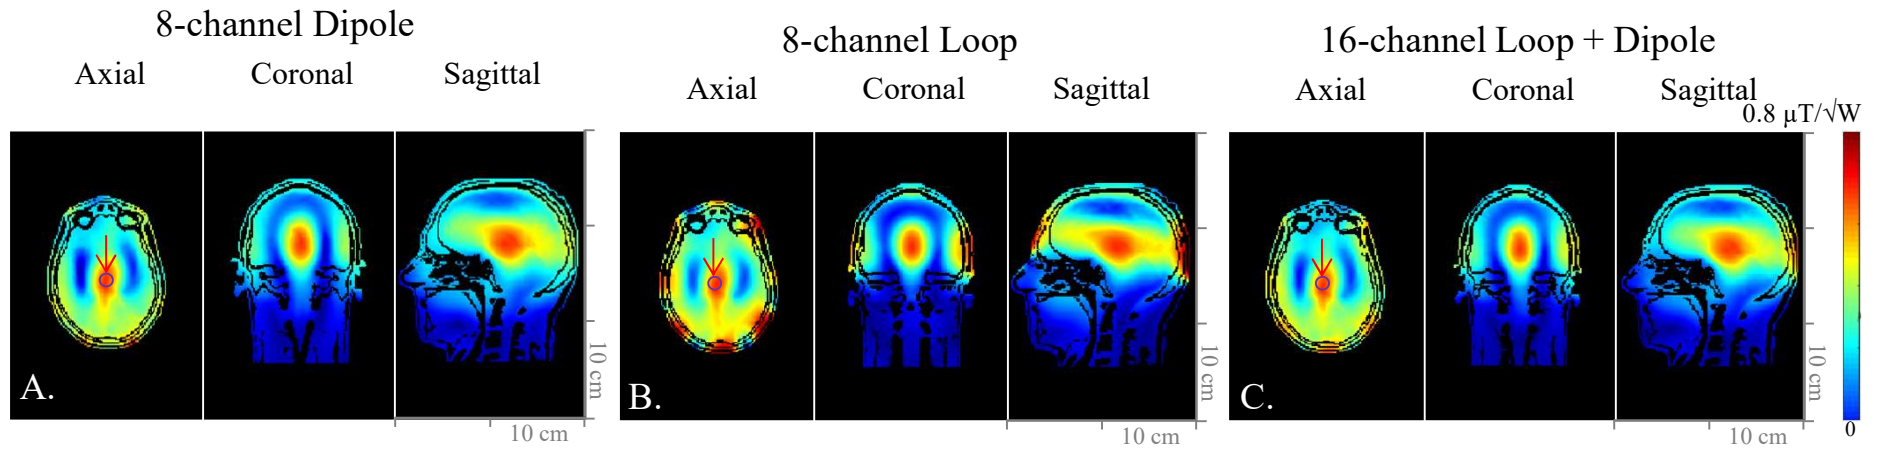

### SAR efficiency ( $B_1^+ / \sqrt{\text{peak } 10 \text{ g SAR}}$ )

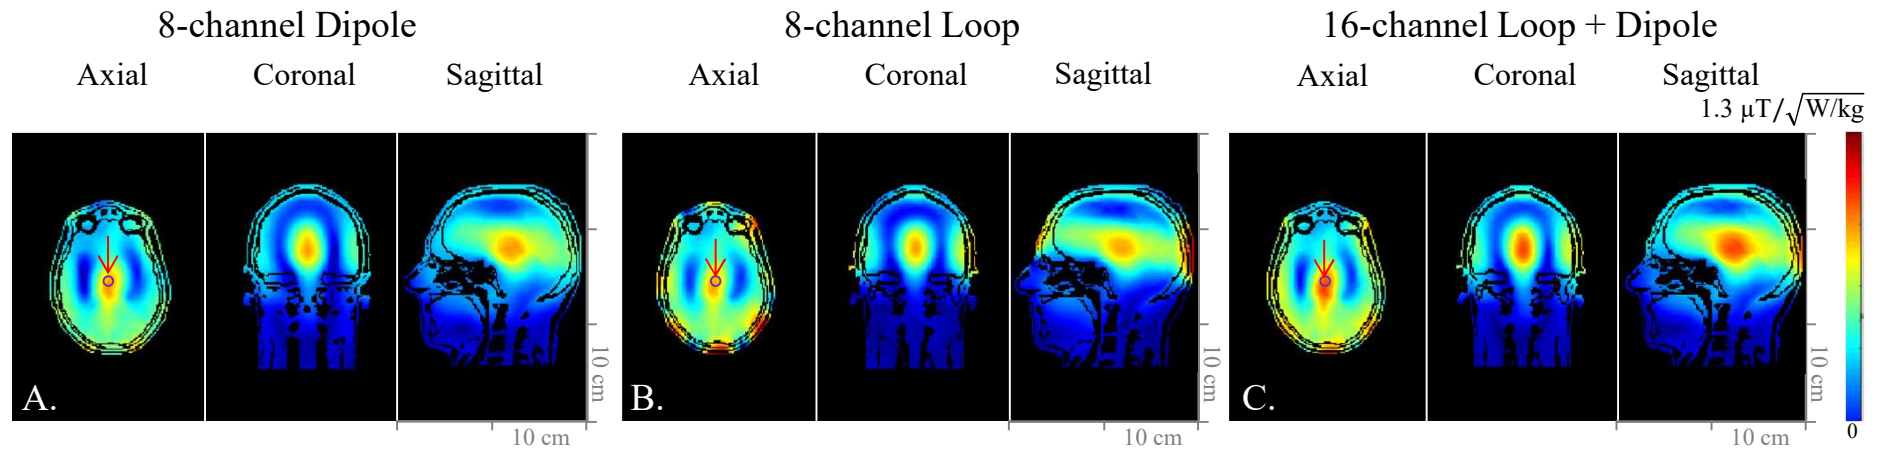

**SUPPLEMENTARY FIGURE 1.** Simulated  $B_1^+$  efficiency (a-c) and SAR efficiency (d-f) maps of the 8-channel dipole antenna, the 8-channel loop, and the 16-channel LD arrays in the axial, coronal and sagittal planes.
